# Supplementary material for: MiR-448 promotes glycolytic metabolism of gastric cancer by downregulating KDM2B
Source: PubMed Central journal article supplement (PMC5008346; doi:10.18632/oncotarget.8020), 2016-03-10
Supplement: oncotarget-07-22092-s001.pdf [file oncotarget-07-22092-s001.pdf]

## MiR-448 promotes glycolytic metabolism of gastric cancer by downregulating KDM2B

### Supplementary Materials

**Supplementary Table S1: Relationship between miR-448 Expression and Clinicopathologic Features of GC Patients (n = 81)**

| Features                     | Relative miR-448 expression |               | P Value |
|------------------------------|-----------------------------|---------------|---------|
|                              | Low (n = 40)                | High (n = 41) |         |
| Gender                       | Male                        | 29            | NS      |
|                              | Female                      | 11            |         |
| Age                          | ≤ 50                        | 21            | NS      |
|                              | > 50                        | 19            |         |
| Histological Differentiation | Poor                        | 6             | < 0.01  |
|                              | Moderate                    | 11            |         |
|                              | Well                        | 23            |         |
| Tumor size (cm)              | ≤ 5                         | 27            | < 0.01  |
|                              | > 5                         | 13            |         |
| TNM Stage                    | I–II                        | 25            | NS      |
|                              | III–IV                      | 15            |         |
| LN metastasis                | Yes                         | 6             | NS      |
|                              | No                          | 34            |         |
| Distant metastasis           | Yes                         | 4             | < 0.01  |
|                              | No                          | 36            |         |

**Note:** GC patients were divided into miR-448 ‘High’ group (Relative fold change was higher than the median) and ‘Low’ group (Relative fold change was lower than the median).

**Abbreviations:** LN, lymph node; TNM, tumor-nodes-metastasis; NS, not significant between any groups. Differences among variables were assessed by  $\chi^2$  or Fisher’s exact  $\chi^2$  test.
